# Supplementary material for: Distinct roles for MDA5 and TLR3 in the acute response to inhaled double-stranded RNA
Source: PubMed Central journal article supplement (PMC6505938; doi:10.1371/journal.pone.0216056), 2019-05-08

Wild-type

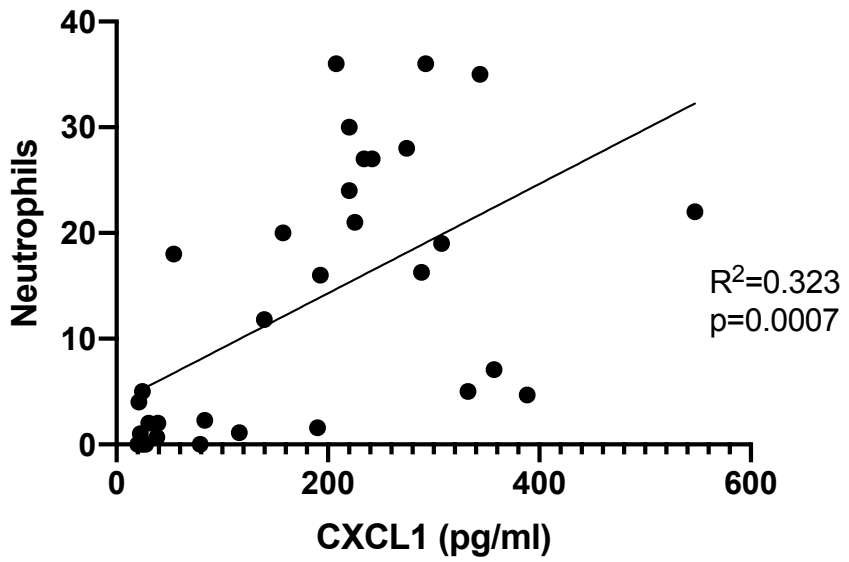

Figure S1 Legend. Correlation analyses between BAL neutrophil percentages and BAL CXCL1 levels in wild-type, TLR3-, and MDA5-deficient mice.

TLR3 knock-out

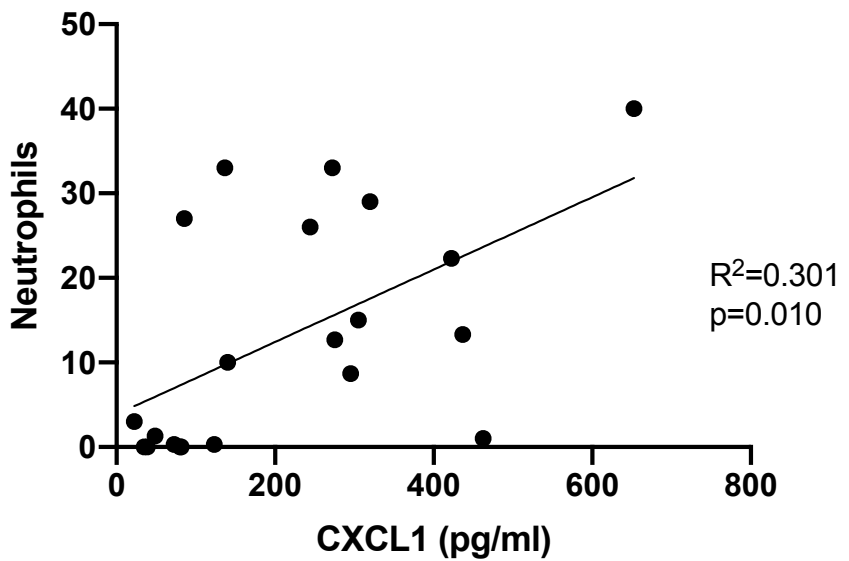

MDA5 knock-out

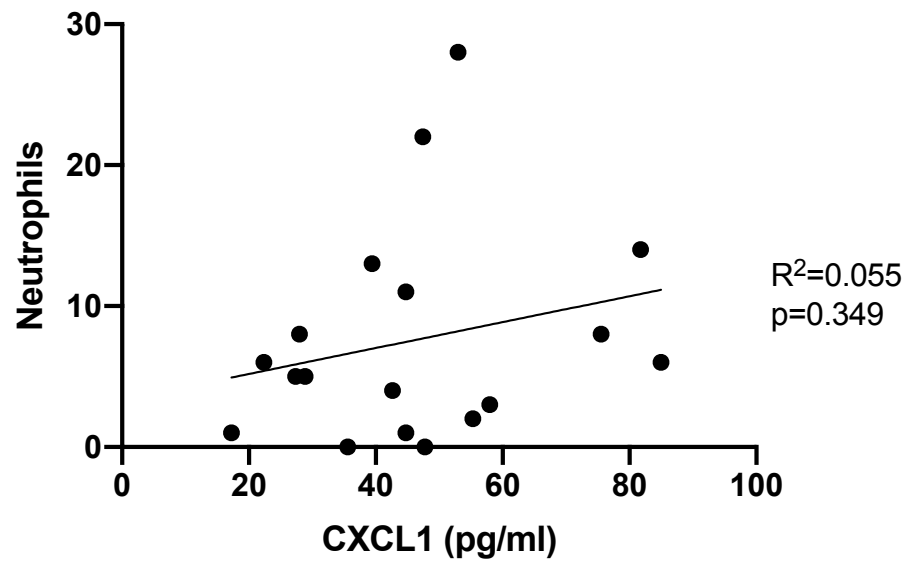

Supplement: pone.0216056.s001.pdf [file pone.0216056.s001.pdf]
