# Supplementary material for: Distinct roles for MDA5 and TLR3 in the acute response to inhaled double-stranded RNA
Source: PubMed Central journal article supplement (PMC6505938; doi:10.1371/journal.pone.0216056), 2019-05-08
Supplement: pone.0216056.s002.pdf [file pone.0216056.s002.pdf]

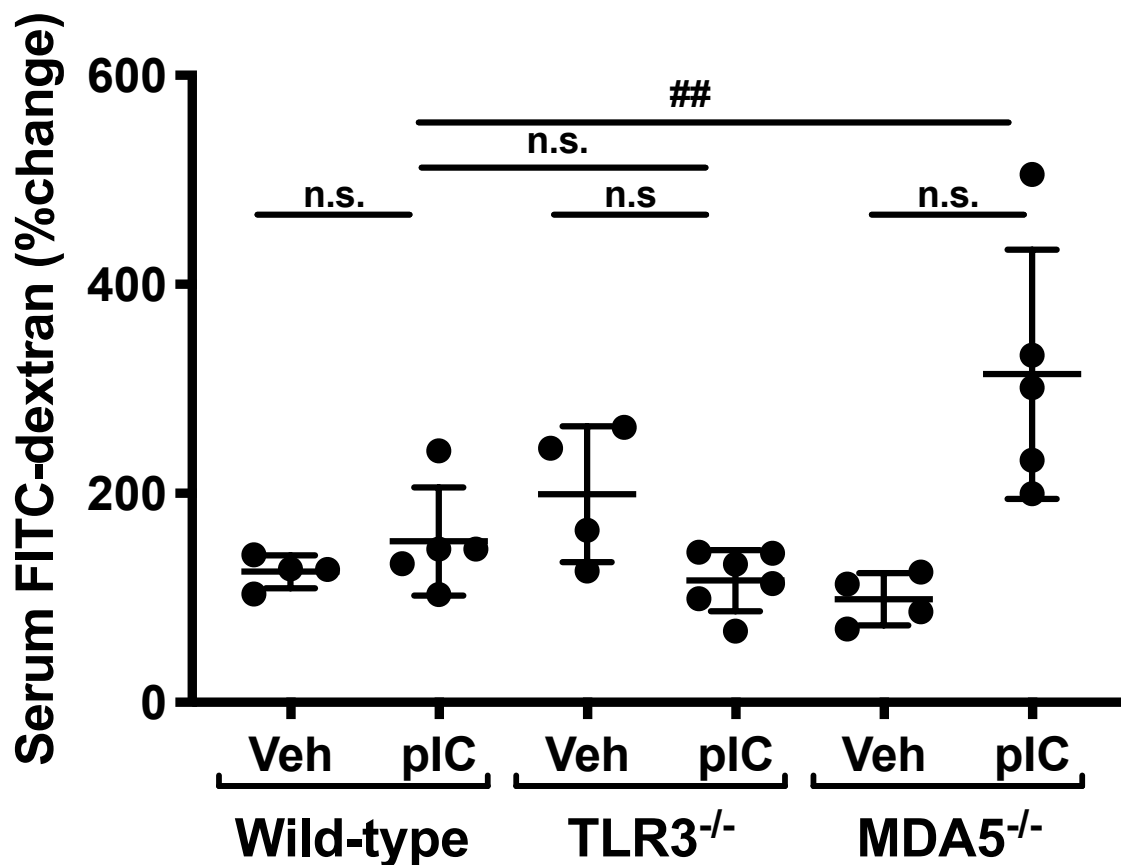

**Figure S2 legend.** Serum levels of FITC-dextran in wild-type, TLR3-deficient, and MDA5-deficient mice. Mice were challenged with vehicle or inhaled poly:I:C (pIC) for three days, and then injected i.p. with 4 kDa FITC-dextran (5 mg) one hour prior to sacrifice. Serum was collected and analyzed for relative fluorescence as in the Methods section. n.s. = not-significant. ## p < 0.01.
